# Supplementary material for: Corrosion Protection of Q235 Steel Using Epoxy Coatings Based on Polyaniline Loaded with Benzotriazole
Source: MDPI journal article supplement (doi:10.3390/coatings14040456), 2024-04-10
Supplement: s1 [file s1]

Archive with 1 entries (1 files):
- coatings-2906340-SI.pdf
